# Supplementary material for: Patient Involvement in Decision-Making: An Important Parameter for Better Patient Experience—An Observational Study (STROBE Compliant)
Source: PubMed Central journal article supplement — J Patient Exp. 2018 Aug 2;6(3):231–7. doi: 10.1177/2374373518790043 (PMC6739683; doi:10.1177/2374373518790043), 2018-08-02
Supplement: Supplementary_table.pdf [file Supplementary_table.pdf]

### Supplementary table

| <b>Supplementary table 1: Relationship of responses and demographic variables</b>                                                          | Relation with age<br>U (p value) | Relation with education<br>U (p value) | Relationship with diagnosis X <sup>2</sup><br>(p value) |
|--------------------------------------------------------------------------------------------------------------------------------------------|----------------------------------|----------------------------------------|---------------------------------------------------------|
| Question                                                                                                                                   |                                  |                                        |                                                         |
| 1. When you had important questions to ask a doctor, did you get answers that you could understand?                                        | 571.5<br>(0.462)                 | 630.0<br>(0.940)                       | 3.339<br>(0.068)                                        |
| 2. When you had important questions to ask a nurse, did you get answers that you could understand?                                         | 676.0<br>(0.649)                 | <b>451.5</b><br><b>(0.015)*</b>        | 0.166<br>(0.684)                                        |
| 3. Sometimes in a hospital, one doctor or nurse will say one thing and another will say something quite different. Did this happen to you? | 1124.0<br>(0.067)                | 1117.5<br>(0.367)                      | 0.104<br>(0.747)                                        |
| 4. If you had any anxieties or fears about your condition or treatment, did a doctor discuss them with you?                                | 448.0<br>(0.692)                 | 341.0<br>(0.189)                       | 0.055<br>(0.815)                                        |
| 5. Did doctors talk in front of you as if you weren't there?                                                                               | 1168.5<br>(0.142)                | 1153.5<br>(0.677)                      | 1.414<br>(0.234)                                        |
| 6. Did you want to be more involved in decisions made about your care and treatment                                                        | 541.5<br>(0.544)                 | 501.5<br>(0.533)                       | 0.287<br>(0.592)                                        |
| 7. Overall did you feel you were treated with respect and dignity while you were in the hospital                                           | 535.0<br>(0.164)                 | 623.0<br>(0.629)                       | 0.276<br>(0.600)                                        |
| 8. If you had any anxieties or fears about your condition or treatment, did a nurse discuss them with you?                                 | 823.5<br>(0.468)                 | 766.0<br>(0.508)                       | 0.366<br>(0.545)                                        |
| 9. Did you find someone on the hospital staff to talk about your concerns                                                                  | 797.0<br>(0.073)                 | 908.5<br>(0.934)                       | 3.004<br>(0.083)                                        |
| 10. Do you think the hospital staff did everything they could to help control the pain                                                     | 366.5<br>(0.303)                 | 270.0<br>(0.427)                       | 3.226<br>(0.072)                                        |

|                                                                                                                             |                  |                  |                                 |
|-----------------------------------------------------------------------------------------------------------------------------|------------------|------------------|---------------------------------|
| 11. If your family or someone else close to you wanted to talk to the doctor, did they have enough opportunity to do so?    | 480.5<br>(0.614) | 475.0<br>(0.229) | 0.258<br>(0.611)                |
| 12. Did the doctors or nurses give your family or someone close to you all the information they needed to help you recover? | 252.5<br>(0.362) | 281.0<br>(0.839) | 0.702<br>(0.402)                |
| 13. Did a member of staff explain the purpose of the medicines you were to take at home in a way you could understand?      | 413.0<br>(0.468) | 361.0<br>(0.968) | 1.808<br>(0.179)                |
| 14. Did a member of staff tell you about medication side effects to watch for when you went home?                           | 475.5<br>(0.155) | 488.5<br>(0.805) | 0.192<br>(0.661)                |
| 15. Did someone tell you about the danger signals regarding your illness or treatment to watch for after you went home?     | 483.0<br>(0.133) | 501.0<br>(0.323) | <b>5.592</b><br><b>(0.019)*</b> |
